# Supplementary material for: Identification of Indicator Genes for Agar Accumulation in Gracilariopsis lemaneiformis (Rhodophyta)
Source: MDPI journal article supplement (doi:10.3390/ijms25094606), 2024-04-23
Supplement: s1 [file s1]

## Supplementary Materials- Figure

1.

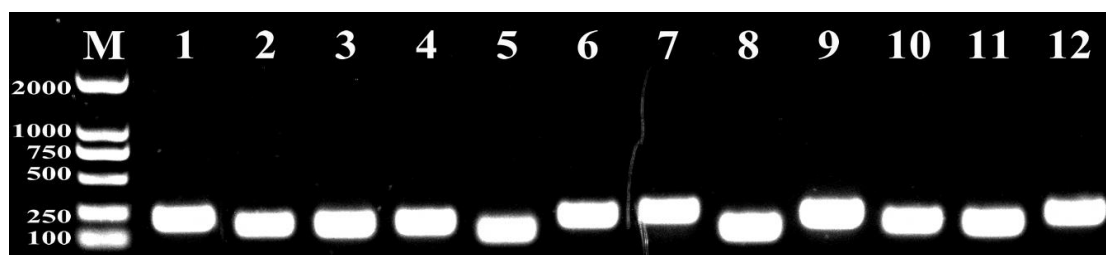

Figure S1 The results of electrophoresis on an agarose gel of the amplification products for the primers ( $T_m = 55\text{ }^{\circ}\text{C}$ )

Figure S1. lane M: DNA Marker (bp), lane 1: *gpiI*, lane 2: *gpilI*, lane 3: *pgm*, lane 4: *ugp*, lane 5: *galt*, lane 6: *gatI*, lane 7: *gatII*, lane 8: *mpi*, lane 9: *pmm*, lane 10: *mpg*, lane 11: *gme*, lane 12: *act*.

2.

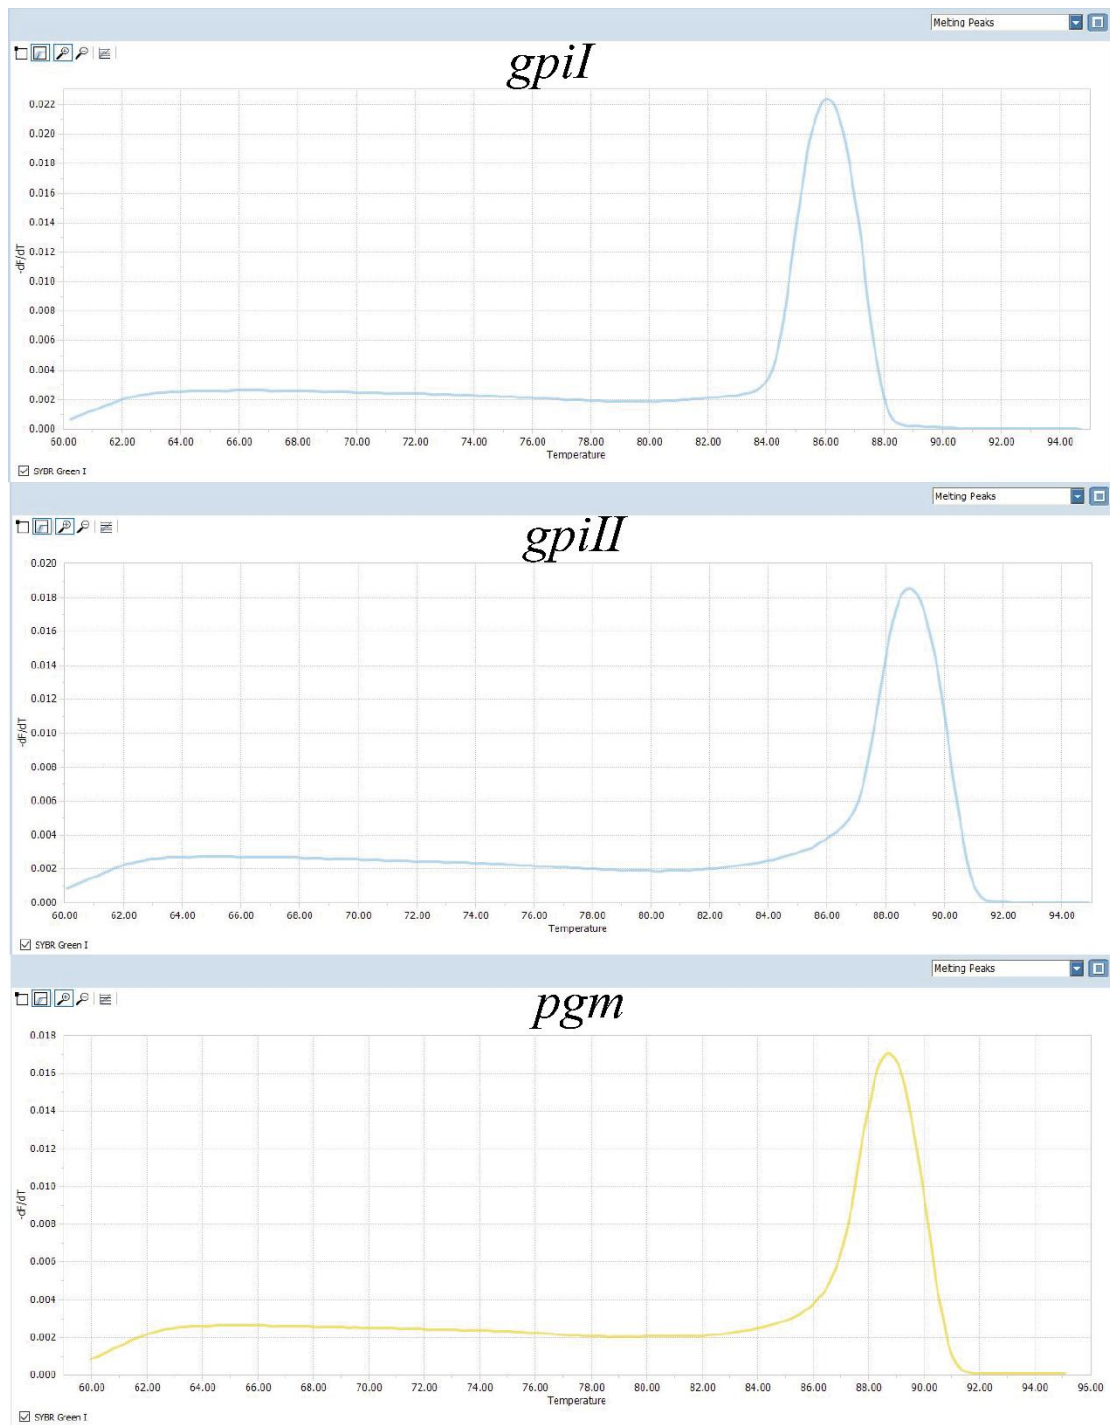

Figure S2 The melting curves of the amplification products for the primers

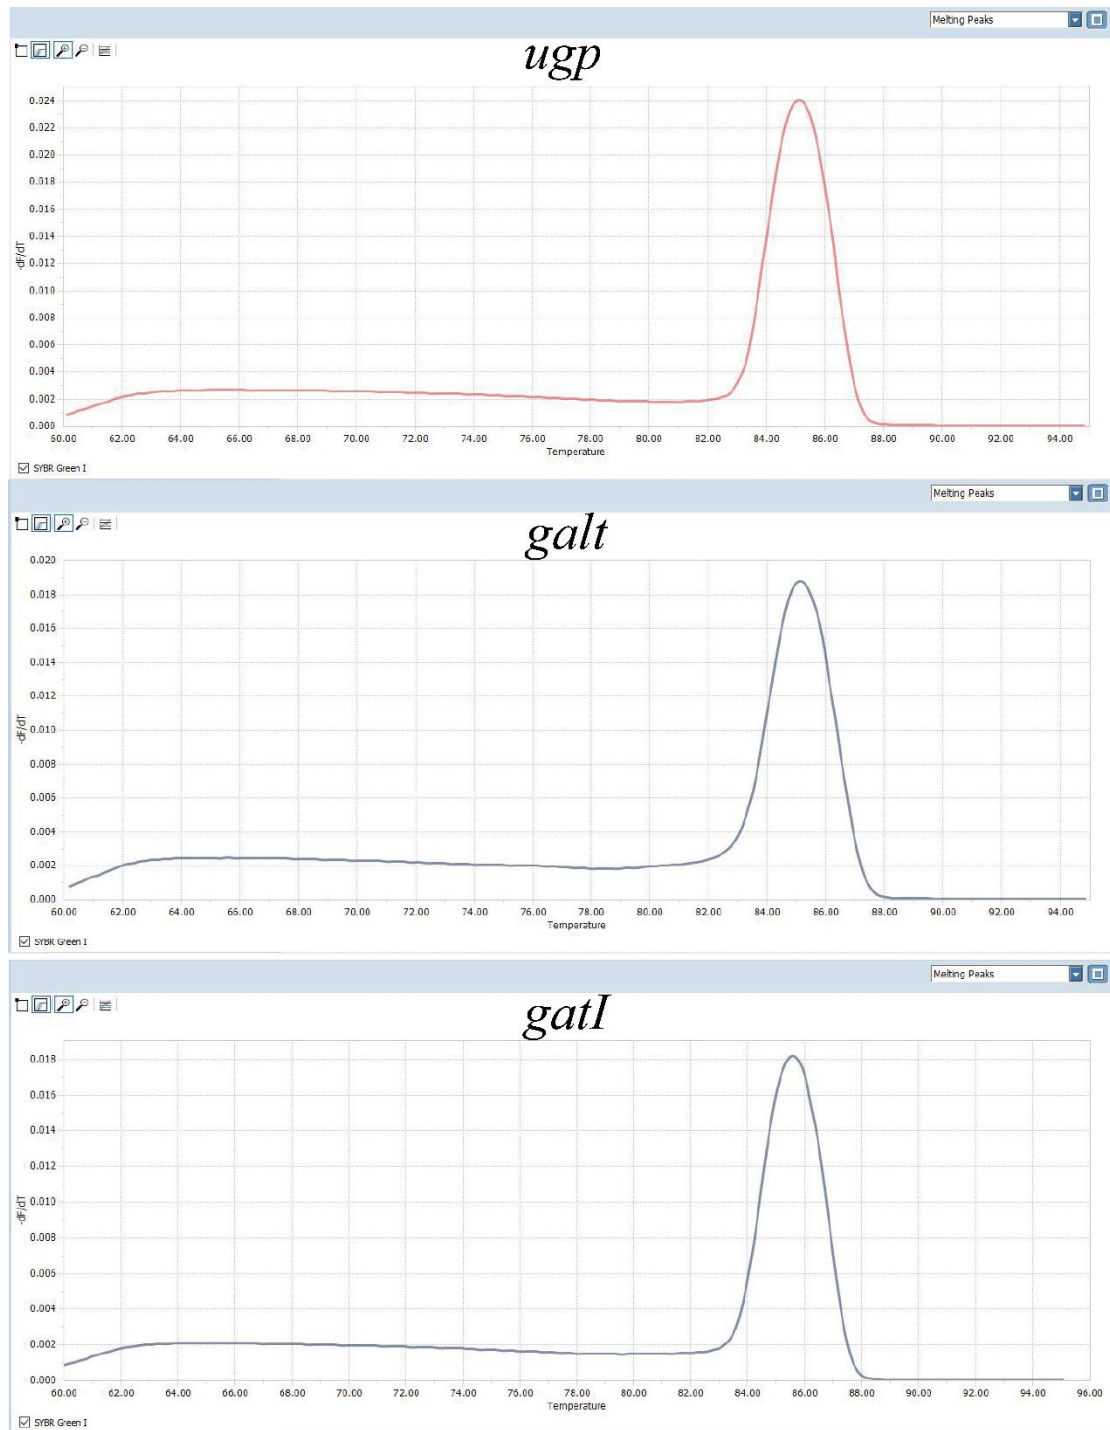

Figure S2 (continued)

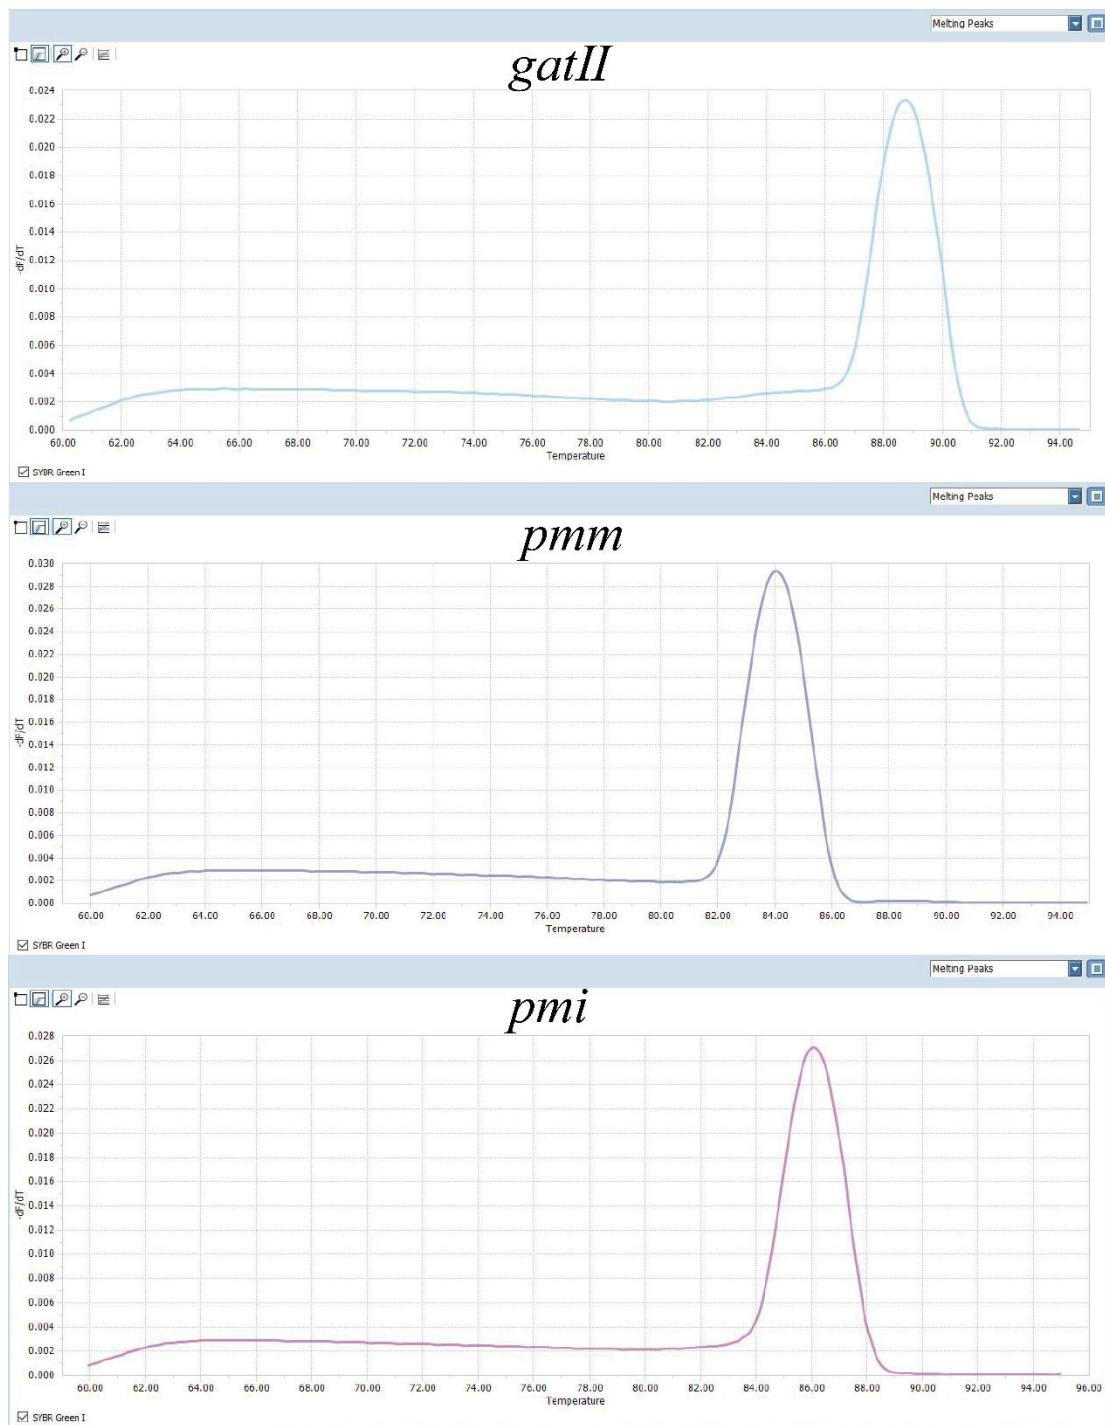

Figure S2 (continued)

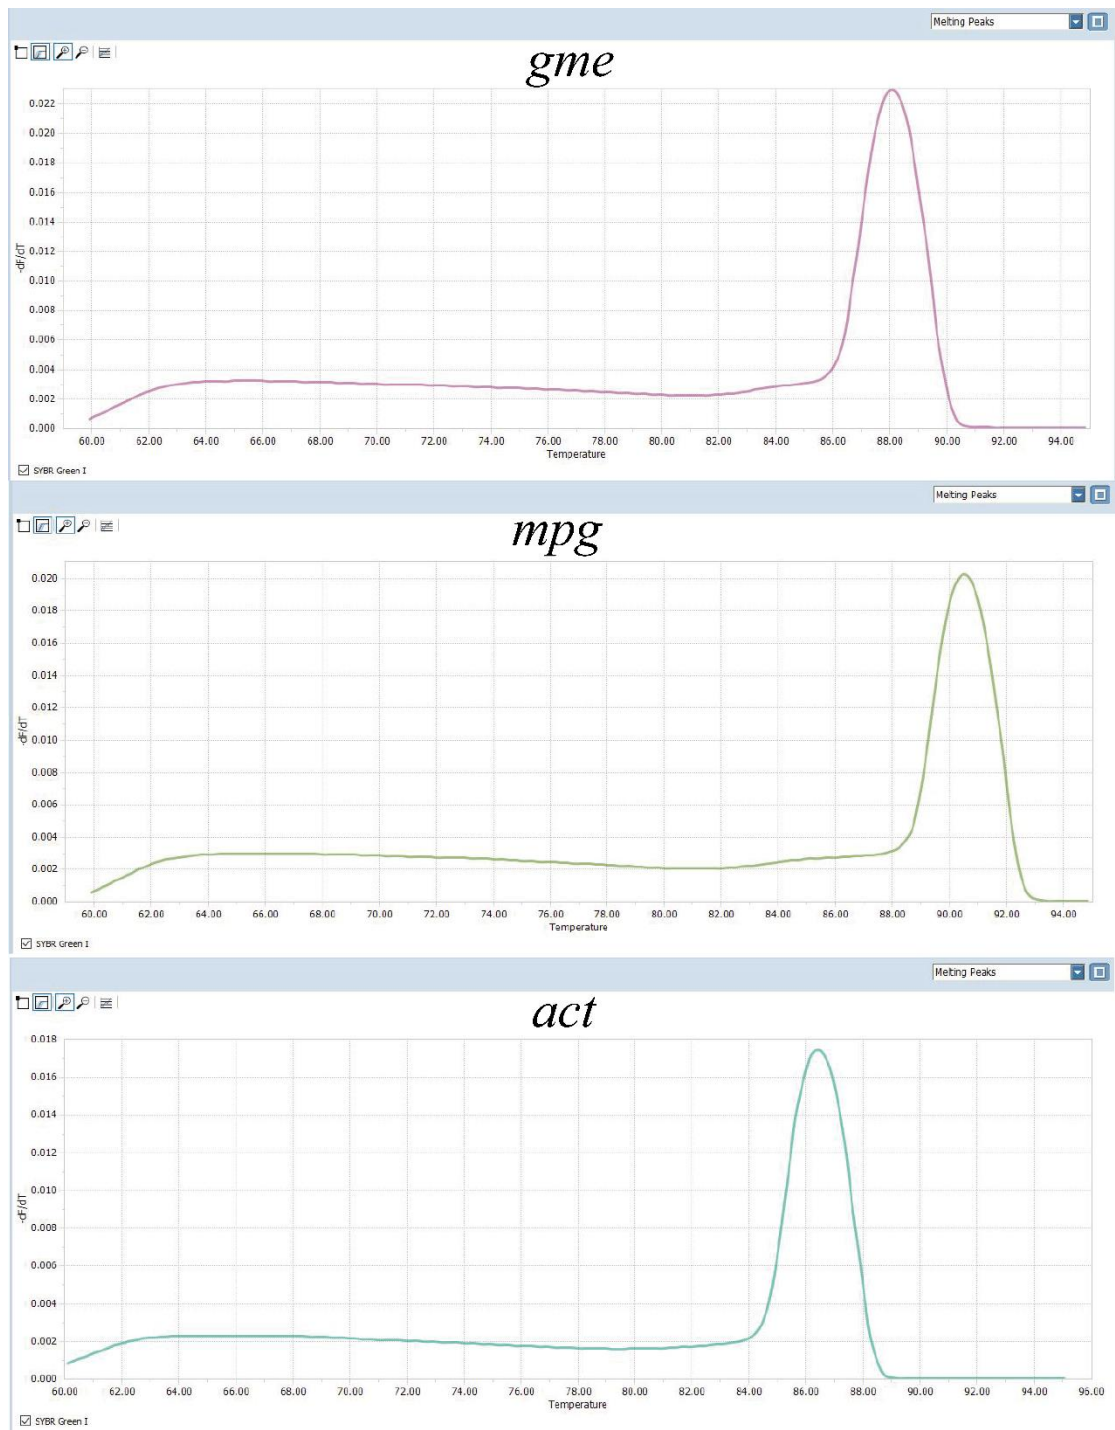

Figure S2 (continued)
